# Supplementary material for: The delayed kinetics of Myddosome formation explains why amyloid-beta aggregates trigger Toll-like receptor 4 less efficiently than lipopolysaccharide
Source: eLife. 2024 Jun 12;13:RP92350. doi: 10.7554/eLife.92350 (PMC11168745; doi:10.7554/eLife.92350)
Supplement: Figure 4—source data 1. [file elife-92350-fig4-data1.xlsx]

## Sheet: Sheet1
first time to form (lps stim)/s	first time to formation (abeta stim)/s
80	376
256	528
216	336
32	136
88	520
184	208
80	96
72	136
56	80
32	296
216	288
64	528
112	224
24	560
48	616
96	264
48	256
24	800
80	936
24	224
32	480
24	680
40	624
32	328
144	384
48	32
56	160
56	544
208	192
144	344
128	520
112	216
64	384
32	1360
40	392
72	488
24	496
16	288
32	160
	152
