# Supplementary material for: The delayed kinetics of Myddosome formation explains why amyloid-beta aggregates trigger Toll-like receptor 4 less efficiently than lipopolysaccharide
Source: eLife. 2024 Jun 12;13:RP92350. doi: 10.7554/eLife.92350 (PMC11168745; doi:10.7554/eLife.92350)
Supplement: Figure 5—source data 1. [file elife-92350-fig5-data1.xlsx]

## Sheet: Lifetimes per puncta
Puncta lifetime following LPS stim/s	Puncta lifetimes following abeta stim/s
28	14
11	15
5	14
15	10
3	4
15	6
5	2
5	27
3	4
5	18
12	23
2	23
15	11
4	25
3	2
3	6
5	6
4	11
27	7
29	6
7	11
4	44
2	34
12	15
7	30
7	30
9	7
14	5
78	39
6	7
4	5
	10
9	15
7	2
23	13
12	30
6	22
65	65
2	13
5	20
5	22
5	6
138	5
42	10
10	10
8	3
7	14
5	196
12	137
7	53
22	23
4	15
6	2
19	6
3	13
15	3
9	3
6	28
5	12
41	24
51	14
33	15
31	9
24	78
27	69
126	44
6	34
113	31
17	49
192	43
25	15
5	17
6	2
8	16
3	9
4	38
20	11
20	3
7	3
7	81
17	42
8	39
9	27
7	33
11	12
3	39
5	12
13
8	32
17
3	17
9	26
8	18
9	23
2	88
10	24
6	9
5	37
15	21
17	12
4	7
10	188
4	154
3	75
4	42
17	21
10	21
4	7
5	42
6	10
2	5
5	17
43	18
45	10
37	2
6	197
8	15
22	11
15	38
5	6
75	5
22	25
18	27
33	5
10	5
5	4
61	49
28	24
27	15
10	7
19	29
11	12
8	8
9	4
12	16
3	28
134	7
7	5
4	3
8	6
10	15
39	16
10	11
16	6
13	9
6	3
23	19
11	4
2	4
9	12
3	2
4	9
21	11
8	7
7	10
7	7
4	32
6	10
11	6
5	3
4	4
8	84
90	10
64	3
23
25
19	6
37	6
10	3
3	9
3	2
3	2
98	16
126	24
79	22
18	3
6	101
26	73
20	6
2	21
30	5
19	24
4	8
2	11
6	17
10	24
15	10
15	3
5	22
3	19
158	16
28	3
23	2
20	6
4	2
12	2
10	3
12	51
16	32
7	13
98	9
60	3
15	32
5	14
8	16
7	9
10	4
17	2
3	6
4	2
6	11
2	3
18	6
7	28
25	14
4	3
10	12
25	13
3	5
4	6
7	8
14
6	5
12	12
5
11
10	3
4	4
12	9
2	2
7	17
9	11
9	3
9	4
6	3
4	10
6	11
5	22
11	136
3	40
4	6
20	4
6	11
18	18
11	31
4	3
23	3
6	7
20	3
5	10
22	14
9	34
24	2
14	2
15	5
9	24
18	9
12	6
9	2
6	3
5	5
18	7
7	15
20	9
11	18
5	9
12	2
8	5
6	9
15	21
8	22
7	5
3	3
4	17
7	4
52	3
51	17
59	3
81	10
80	4
66	11
80	3
40	6
34	6
30	2
50	45
23	45
30	49
31	43
31	38
25	67
42	37
18	49
24	45
8	23
10	20
17	30
45	18
9	15
20	29
18	16
8	31
9	13
12	7
26	12
15	18
10	10
16	41
4	2
7	5
14	14
6	6
22	17
10	7
7	3
7	20
11	13
13	26
5	21
3	6
6	11
2	7
2	5
21	7
10	2
17	17
21	3
4	3
11	19
13	17
3	8
3	26
5	9
108	7
103	8
77	8
8	13
6	11
5	10
8	9
10	4
10	103
3	49
21	61
6	45
9	63
6	33
7	66
20	23
2	20
4	33
3	40
11	10
7	34
13	17
17	28
37	5
4	13
2	11
6	22
19
7
27
6	19
13	2
17	15
9	3
8	5
13	11
7	10
12	2
9	2
5	9
14	4
4	16
9	2
13	2
11	79
10	47
4	41
2	68
2	49
2	15
7	16
6	11
5	11
12	10
5	33
6	9
3	4
6	26
9	5
5	4
3	5
7	21
8	11
6	18
2	14
5	4
80	17
63	11
33	154
55	133
21	119
20	49
53	46
30	23
15	13
23	6
38	3
31	6
30	5
10	2
34	11
19	15
9	5
44	6
51	17
2	26
21	20
5	58
5	51
3	11
21	4
10	108
11	65
3	44
11	2
4	3
3	14
14	11
2	8
8	44
85	39
5	4
11	2
15	3
13	16
12	43
7	10
5	8
3	19
8	22
3	12
68	18
58	14
37	11
24	4
13	17
5	62
17	14
5	39
11	6
4	5
105	13
11	23
19	9
4	13
12	2
	7
63	62
20	38
7	27
3	21
29	21
27	24
	2
8	46
16	43
2	23
5	10
11	6
4	168
30	17
19	13
20	2
4	30
18	15
41	18
5	4
13	4
114	2
123	8
	9
12	16
26	5
8	12
2	16
25	8
17	7
14	12
8	8
8	66
4	42
13	10
19	10
6	30
9	30
6	9
5	4
11	97
18
5	21
4
75	147
36	65
7	17
11	3
4	8
16	7
26	177
9	132
6	89
11	4
3	5
37	27
19	7
4	12
26	10
8	3
5	37
12	60
6
10	3
6	8
8	42
5	7
17	11
32	10
8	3
9	10
8	5
6	14
26	4
28	4
5	18
11	4
23	6
18	5
8	8
6	56
3	29
17	30
6	3
8	51
6
22
3	5
2	7
6	5
20	8
19	22
4	7
3	6
17	2
2	4
2	4
4	88
4	5
2	10
2	6
4	36
3	10
51	11
63	19
36	7
42	9
27	8
34	4
26	10
21	23
16	5
5	3
10	7
9	7
4	78
12	27
12	15
13	7
24	24
9	16
18	23
6	5
2	15
12	5
8	6
16	79
3	3
23	22
2	40
5	12
20	3
3	2
6	32
15	14
6	17
17	4
23	16
2	5
4	7
7	6
2	15
9	66
2	41
3	14
4	9
10	30
3	5
4	7
12	4
5	3
6	22
2	33
3	8
88
76	10
	4
30	11
23	8
29
15	7
12	18
9	9
	7
11	7
	35
5	9
5	2
4	12
	5
11	14
	7
	3
	12
	14
	10
	50
9	3
3	10
7	5
7	28
7	25
9	5
50	10
51	3
31	9
32	7
12
24	7
12	8
12	9
26	2
4	2
6	7
13	5
10	11
129	5
110	8
99	13
	15
	6
	14
91	15
65	3
38	8
17	24
15	13
14	7
9	3
9	5
3	10
17	2
2	70
5	9
28	18
23	25
20	2
4
9
2	18
13	14
14	44
9	10
12	8
14	183
16	28
2	22
17	4
7	6
20	11
28	3
6	17
11	6
7	5
20	3
5	4
4	41
3	31
12	5
6	14
9	120
13	87
9	16
21	8
14	8
8	12
9	3
5	2
7	18
10	24
6	7
4	8
61	3
61	20
48	4
50	25
38	4
37	19
38	5
34	16
14	36
25	6
11	15
8	18
5	9
15	12
6	9
8	20
4	17
2	17
6	10
25	13
24	22
8	14
3	7
11	6
8	2
5	21
7	5
13	2
9	14
7	4
7	16
7	26
2	8
4	5
4	13
5	27
7	11
4	16
5	11
115	27
92	4
73	15
	13
72	19
26	3
13	11
13	2
15	2
29	25
	18
13	7
	2
28	2
21	24
26	19
26	2
7	15
13	21
7	6
7	4
10	7
102	7
91	7
66	5
64	21
46	16
42	14
20	9
33	12
14	11
18	3
39	6
11	7
35	6
11	2
31	58
21	81
7	82
16	70
13	45
8	61
8	74
123	76
101	55
98	45
79	44
48	70
44	67
13	35
15	47
17	74
14	64
13	37
13	58
8	46
9	44
4	42
2	26
4	24
9	19
6	14
16	20
7	17
5	29
4	58
5	52
8	38
6	29
13	9
6	31
5	10
5	11
14	5
8	17
2	8
15	25
29	17
26	9
5	11
4	33
2	7
7	7
6	17
7	15
5	7
2	32
9	22
4	11
46	7
51	19
49	17
21	19
19	11
14	4
31	12
11	2
15	5
12	5
27	8
23	2
2	5
4	94
3	116
22	77
6	114
12	103
9	87
14
10	65
3	70
2	77
112	59
25	91
7	41
3	43
6	72
9	34
6	28
9	48
19	28
2	21
9	19
5	13
5	23
7	41
31	17
14	33
4	5
4	12
21	9
21	16
6	18
17	27
19	15
8	39
14	11
8	10
6	16
17	12
7	7
56	32
37	9
38	7
42	6
30	29
55	13
13	22
37	2
13	16
12	21
6	3
18	16
22	8
2	13
6	11
3	13
25	4
11	9
9	145
14	184
3	150
108	138
98	141
80	99
96	109
28	79
20	83
31	35
10	48
32	37
11	24
22	23
29	16
7	36
37	18
4	8
13	23
9	10
9	40
28	7
3	7
9	23
12	37
4	13
3	8
11	11
6	36
10	15
81	23
37	7
16	2
13	5
12	17
15	20
13	16
27	4
3	4
30	20
11	11
16	12
19	14
15	2
8	197
197	197
194	197
94	197
37	195
19	194
19	193
20	191
12	190
14	186
5	158
6	146
16	146
12	140
18	125
6	124
27	95
38	59
7	59
6	50
7	37
4	25
6	19
13	21
6	16
2	19
8	17
4	9
3	8
2	9
4	2
14	11
8	22
9	10
4	10
7	9
8	25
2	11
10	10
6	10
11	7
10	9
13	18
16	5
2	9
4	8
16	3
17	16
9	14
7	16
4	4
12	6
9	12
9	5
6	6
13	44
11	13
3	13
3	46
81	18
52	11
72	11
45	12
52	34
42	2
59	10
23	47
54	6
32	4
34	14
23	4
16	9
36	10
11	25
19	10
13	12
36	5
9	10
12	2
16	16
12	19
20	3
3	13
9	13
8	34
2	3
2	3
7	6
18	12
20	2
16	8
14	8
3	7
6	8
12	4
18	3
19	70
11	46
3	35
16	29
14	14
12	14
21	44
8	36
9	18
10	24
8	6
9	2
7	19
4	23
122	26
113	17
66	3
82	2
49	124
47	95
62	84
90	80
20	57
46	51
21	56
36	33
2	22
2	9
29	7
11	28
33	8
	11
30	26
8	3
20	7
8	16
9	15
12	6
5	9
17	10
13	8
75	12
65	15
71	2
84	158
97	119
63	57
	19
	27
52	10
33	3
64	8
33	26
19	5
31	6
31	197
24	162
5	157
19	157
4	155
16	98
9	96
27	7
17	2
45	6
10	4
12	10
21	10
10	9
3	7
13	4
2	6
13	34
8	19
13	4
7	5
8	3
5	6
15	7
11	6
8	3
2	7
152	8
124	5
94	23
83	18
66	5
61	4
59	31
31	20
33	14
32	3
28	7
18	2
18	5
13	2
11	5
11	15
9	16
8	2
6	2
6	8
33	11
2	15
15	14
30	2
11	4
45	2
3	2
15	77
16	39
6	53
23	41
18	26
2	40
8	23
7	9
12	49
72	8
43	34
37	15
17	4
5	9
7	20
	10
10	27
24	6
14	4
8	20
2	7
72	14
71	15
44	12
13	6
24	102
25	98
9	93
9
21	113
11	98
16	81
7	61
161	57
73
68	58
47
11
2	24
4	14
29	32
2	32
6	39
22	27
11	11
2	6
4	19
22	15
9	5
8	9
6	171
19	164
8	137
8	168
77	114
34	98
47	40
64	15
36	33
26	7
8	35
14	8
43	10
4	4
14	25
11	2
10	2
8	4
14	7
5	190
5	184
6	170
113	149
106	149
18	127
26	101
11	79
27	74
32	67
11	36
18	30
14	27
8	18
3	16
39	4
42	3
21	5
14	4
26	12
12	5
4	5
4	6
4	54
75	21
9	14
4	14
11	4
3	24
8	24
37	9
9	92
3	42
3	9
10	22
19	7
15	127
5	84
7	65
14	6
8	14
12	18
7	9
13	20
55	9
45	11
66	2
43	7
33	197
49	6
23	42
12	11
23	2
6	2
29	6
26	3
4	2
29	4
9	3
13	2
3	15
7	3
12	13
10	3
120	15
96	2
54	4
20	40
20	30
19	22
14	48
31	32
2	9
13	28
4	10
8	8
183	10
106	12
66	5
27	34
2	18
32	23
3	16
29	2
8	41
3	9
6	23
6	20
3	17
197	12
197	8
197	5
197	156
17	50
9	34
9	14
3	18
4	19
12	9
11	6
12	13
3	6
2	6
13	4
29	6
5	5
12	63
5	65
5	29
9	30
6	25
18	4
2	7
2	4
12	15
2	3
14	3
8	2
3	5
2	16
7	3
42	10
63	9
23	12
28	32
30	29
33	18
25	13
13	15
7	9
6	10
25	2
2	3
5	9
12	13
8	5
15	44
12	35
2
4	28
114	13
	5
48	7
24	129
27	38
10	15
12	15
34	7
5	4
14	24
	13
	5
4	4
2	22
4	10
2	22
36	8
16	14
3	10
14	27
8	5
9	19
6	5
41	3
28	15
7	7
5	45
11	82
40	31
12	10
15	52
9	8
4	11
15	28
90	12
58	11
21	36
17	5
8	8
9	7
2	9
9	34
6	33
6	2
16	19
8	4
6	8
10	106
16	77
9	9
6	3
2	16
6	2
20	18
6	195
7	136
8	12
4	2
5	5
5	4
7	6
8	11
4	3
7	18
15	22
3	17
5	8
7	66
8	30
3	24
7	21
9	25
5	4
11	114
5	79
2	26
7	19
11
4	7
30	9
23	5
6	3
7	24
	8
12	6
50	13
9	6
11	17
8	10
4	5
28	11
197	9
5	41
4	9
35	9
48	17
34	12
28	8
6	13
11	84
24	15
12	18
12	19
102	14
	6
100	8
32	18
	10
	28
12
59	11
63	6
10	139
13	91
11	39
5	8
22	11
21	4
2	183
5	161
3	33
6	12
8	4
11	2
28	26
13	6
13	21
35	18
19	11
2	20
16	31
7	11
10	2
4	14
6	2
13	55
2	50
32	25
14	32
8	16
4	12
15	4
3	22
2	10
10	37
65	20
49	30
28	14
54	18
31	14
23	6
7	6
20	87
15	31
23	19
6	21
32	3
5	27
3	3
3	5
8	9
8	13
4	16
19	10
10	17
103	13
	2
55	10
52	11
29	4
21	111
10	68
8	25
3	3
12	27
3	3
	7
	9
	7
	11
14	196
33	197
14	194
4	67
6	51
22	21
7	7
9	9
181	20
147	19
69	16
90	4
41	11
14	44
13	12
2	3
30	11
6	36
4	6
2	93
3	71
11	42
87	15
80	14
31	5
17	25
10	7
7	8
7	42
2	21
4	16
5	7
7	6
5	6
10	57
83	3
7	3
27	3
93	6
	12
	3
	6
4	16
5	4
142	10
45	15
7	6
5	4
8	30
57	10
13	4
13	7
26	85
8	46
5	20
14	20
4	21
2	6
2	6
9	5
5	14
17	12
11	25
68	8
68	10
23	30
57	11
21	47
13	28
5	17
11	6
	13
	9
144	3
86	11
49	4
9	5
36	25
13	35
3	42
13	11
9	12
19	14
7
16	19
6	25
6	8
5	7
73	5
74	6
43	18
73	10
5	11
7	6
	16
28	6
4	8
32	16
3	12
165	10
65	11
13	21
6	31
22	17
35	26
14	2
7	7
6	6
4	7
6	28
6	13
14	3
12	13
16	12
9	11
5	2
55	7
80	7
48	4
70	13
63	8
39	9
41	8
26	48
7	43
17	60
40	32
49	38
	37
32	17
4	11
5	22
100	14
7	10
8	6
4	12
4	2
2	26
19	29
11	28
51	2
17	9
4	20
9	10
5	3
18	11
6	119
23	46
13	50
13	29
11
11	14
8	15
20	24
8	169
25	155
4	176
12	136
14	39
7	6
6	10
90	8
6	12
4	2
16	12
38	3
8	197
10	194
17	150
31	148
112	80
36	77
13	40
3	19
18	13
29	12
5	12
11	11
17	4
3	15
8	9
14	10
5	15
6	40
7	27
6	7
45	39
51	23
13	16
5	3
23	15
34	20
8	5
4	4
18	14
8	4
8	27
13	8
	30
16	63
12	45
23	58
32	51
	47
	27
36	45
26	4
12	8
37	30
46	14
10	23
22	11
22	7
33	15
8	17
14	13
5	89
191	113
121
54	16
26	9
20	95
12	98
3	11
6	5
19	18
17	14
9	3
40	36
20	9
5	8
31	2
6	3
16	8
9	39
10	13
18	9
4	9
18	3
31	12
10	12
17	68
7	98
10	66
12	39
16
10	91
3	23
12	14
12	12
7	12
10	11
86	2
53	5
20	6
14	20
18	10
12	14
9	15
5	10
7	5
20	11
11	12
10	9
12	56
85	68
60	5
22	5
16	14
12	2
32	4
11	4
24	11
5	41
4	39
15	7
15	20
4	184
171	17
33	19
5	25
32	4
2	19
5	5
11	4
4	7
11	12
30	6
8	5
3	4
10	13
12	2
5	4
16	26
17	34
21	40
2	25
29	52
16	31
9	6
4	4
8	8
9	6
4	10
4	9
87	4
36
23	35
12	5
12	10
9	11
11	13
3	98
7	13
2	11
4	8
2	5
82	32
22	29
5	26
29	4
25	45
24	47
	7
	16
	9
31	9
26	37
2	30
13	10
3	9
8	14
43	16
22	2
31	16
14	8
15	3
4	6
20	8
5	29
11	18
15	4
12	26
6	10
4	3
12	16
5	7
8	19
5	9
17	6
9	17
6	11
5	12
14	8
22	3
10	9
10	9
7	9
8	8
67	2
36	43
22	45
37	48
34	60
5	22
3	16
8	20
15	6
4	7
10	6
25	9
23	2
11	19
21	4
16	5
5	16
100	4
38	5
48	6
8	103
18	115
10	76
	106
4	105
2	46
15
139	48
61	20
60	44
30	26
38
11	12
5
21
5	32
8	35
2	8
94	14
56	4
24	150
7	69
3	59
11	46
7	22
9	17
7	24
8	24
10	10
4	7
10	7
19	6
8	14
14	9
9	10
23	3
8	197
26	197
7	100
34	16
5	14
7	11
17	5
10	2
7	2
14	6
6	11
8	38
11	11
12	3
8	9
48	3
51	28
47	32
30	11
34	8
35	2
45	26
19	23
23	29
12
30	12
31	6
7	3
3	22
6	34
7	11
5	3
27	12
12	12
7	43
19	3
[truncated: 236 more rows]
