# Supplementary material for: The delayed kinetics of Myddosome formation explains why amyloid-beta aggregates trigger Toll-like receptor 4 less efficiently than lipopolysaccharide
Source: eLife. 2024 Jun 12;13:RP92350. doi: 10.7554/eLife.92350 (PMC11168745; doi:10.7554/eLife.92350)
Supplement: Figure 7—source data 1. [file elife-92350-fig7-data1.xlsx]

## Sheet: Jump distance analysis
LPS stimulation						Abeta stimulation
Time/s	Membrane localised puncta (count/cell)	Cytoplasm localised puncta (counts/cell)				Time/s	Membrane localised puncta (count/cell)	Cytoplasm localised puncta (counts/cell)
10	0	0				10	0	0
20	0	0				20	0	0
30	0.55	0				30	0.21053	0
40	0.85	0				40	0.21053	0
50	0.9	0				50	0.31579	0
60	0.95	0.05				60	0.47368	0
70	1.3	0				70	0.47368	0
80	1.4	0.05				80	0.47368	0
90	1.55	0.15				90	0.78947	0
100	1.5	0.2				100	0.68421	0.05263
110	1.6	0.25				110	0.73684	0.10526
120	1.85	0.25				120	0.78947	0.10526
130	1.45	0.45				130	0.89474	0.05263
140	1.35	0.55				140	1	0.05263
150	1.35	0.5				150	0.89474	0.15789
160	1.5	0.4				160	0.94737	0.21053
170	1.7	0.4				170	1.10526	0.26316
180	1.75	0.4				180	1.05263	0.26316
190	2.05	0.35				190	1.10526	0.26316
200	2.15	0.3				200	1.05263	0.21053
210	2.1	0.4				210	0.94737	0.26316
220	2.2	0.35				220	1.05263	0.10526
230	2.25	0.35				230	1.15789	0.05263
240	2.1	0.4				240	1.26316	0.05263
250	1.95	0.45				250	1.26316	0.10526
260	2	0.45				260	1.31579	0.10526
270	2.05	0.4				270	1.21053	0.10526
280	2.15	0.35				280	1.05263	0.21053
290	2	0.35				290	1.15789	0.21053
300	1.9	0.5				300	1.21053	0.21053
310	2.4	0.4				310	1.31579	0.26316
320	2.35	0.5				320	1.47368	0.21053
330	2.25	0.5				330	1.36842	0.15789
340	2.35	0.45				340	1.47368	0.15789
350	2.1	0.65				350	1.63158	0.15789
360	2.25	0.55				360	1.73684	0.10526
370	2.4	0.55				370	1.78947	0.10526
380	2.3	0.6				380	1.78947	0.15789
390	2.15	0.65				390	1.94737	0.10526
400	2	0.65				400	2.05263	0.15789
410	2.15	0.5				410	2.21053	0.26316
420	2.25	0.6				420	2.36842	0.15789
430	2.1	0.7				430	2.31579	0.15789
440	2.25	0.6				440	2.15789	0.26316
450	2.25	0.5				450	2	0.31579
460	2.35	0.5				460	1.94737	0.36842
470	2.4	0.5				470	1.78947	0.42105
480	2.35	0.45				480	2	0.36842
490	2.45	0.45				490	2	0.36842
500	2.4	0.35				500	2	0.31579
510	2.45	0.4				510	2	0.31579
520	2.55	0.4				520	1.73684	0.31579
530	2.6	0.35				530	1.78947	0.31579
540	2.9	0.3				540	1.68421	0.31579
550	3.1	0.4				550	1.68421	0.31579
560	3.1	0.4				560	1.57895	0.47368
570	2.9	0.55				570	1.52632	0.31579
580	2.8	0.55				580	1.63158	0.31579
590	2.75	0.65				590	1.68421	0.31579
600	2.85	0.6				600	1.52632	0.42105
610	2.9	0.6				610	1.63158	0.31579
620	2.8	0.55				620	1.63158	0.26316
630	2.95	0.55				630	1.47368	0.36842
640	3	0.55				640	1.68421	0.31579
650	3	0.4				650	1.63158	0.36842
660	3.15	0.3				660	1.73684	0.31579
670	3.1	0.35				670	1.73684	0.36842
680	3	0.35				680	1.78947	0.36842
690	2.6	0.45				690	1.63158	0.31579
700	2.75	0.45				700	1.73684	0.15789
710	2.7	0.5				710	2	0.10526
720	2.6	0.45				720	2.10526	0.15789
730	2.4	0.45				730	2.10526	0.15789
740	2.45	0.5				740	2.15789	0.21053
750	2.4	0.5				750	2.21053	0.21053
760	2.55	0.45				760	2.05263	0.36842
770	2.5	0.45				770	2.05263	0.36842
780	2.65	0.4				780	1.94737	0.36842
790	2.85	0.35				790	2.10526	0.36842
800	3.05	0.35				800	2.21053	0.36842
810	3	0.5				810	2.15789	0.42105
820	2.9	0.6				820	2.05263	0.52632
830	2.95	0.5				830	2.21053	0.47368
840	2.8	0.55				840	2.05263	0.57895
850	2.9	0.5				850	2.21053	0.47368
860	3.1	0.3				860	2	0.57895
870	3.1	0.4				870	2.31579	0.52632
880	2.9	0.6				880	2.36842	0.42105
890	2.65	0.7				890	2.42105	0.47368
900	2.8	0.55				900	2.52632	0.47368
910	2.75	0.6				910	2.42105	0.57895
920	2.85	0.4				920	2.36842	0.52632
930	2.65	0.65				930	2.57895	0.52632
940	2.7	0.55				940	2.57895	0.52632
950	2.4	0.8				950	2.63158	0.52632
960	2.45	0.7				960	2.63158	0.52632
970	2.6	0.65				970	2.78947	0.52632
980	2.4	0.65				980	2.52632	0.57895
990	2.2	0.8				990	2.36842	0.52632
1000	2.75	0.7				1000	2.10526	0.47368
1010	3	0.6				1010	2.52632	0.42105
1020	3.05	0.55				1020	2.63158	0.42105
1030	3.05	0.6				1030	2.73684	0.42105
1040	2.95	0.6				1040	2.57895	0.47368
1050	2.7	0.8				1050	2.47368	0.57895
1060	2.95	0.65				1060	2.63158	0.57895
1070	2.85	0.7				1070	2.68421	0.47368
1080	3	0.7				1080	2.52632	0.42105
1090	2.8	0.75				1090	2.52632	0.31579
1100	2.85	0.55				1100	2.36842	0.52632
1110	2.6	0.6				1110	2.26316	0.31579
1120	2.75	0.6				1120	2.21053	0.31579
1130	2.95	0.55				1130	2.21053	0.36842
1140	3.1	0.6				1140	2.26316	0.31579
1150	3.2	0.65				1150	2.10526	0.36842
1160	3.2	0.55				1160	2.21053	0.36842
1170	3.2	0.7				1170	2.26316	0.36842
1180	3.3	0.7				1180	2.52632	0.26316
1190	3.1	0.8				1190	2.57895	0.36842
1200	3.05	0.85				1200	2.63158	0.42105
1210	3.05	0.6				1210	2.57895	0.42105
1220	2.95	0.75				1220	2.68421	0.47368
1230	2.55	1				1230	2.63158	0.63158
1240	2.65	0.85				1240	2.84211	0.52632
1250	2.85	0.65				1250	2.89474	0.47368
1260	2.95	0.75				1260	2.89474	0.47368
1270	2.8	0.75				1270	2.78947	0.42105
1280	2.85	0.75				1280	2.68421	0.36842
1290	2.95	0.65				1290	2.73684	0.31579
1300	2.85	0.75				1300	2.73684	0.31579
1310	2.9	0.75				1310	2.73684	0.31579
1320	3.15	0.55				1320	2.73684	0.31579
1330	3.15	0.65				1330	2.63158	0.42105
1340	3	0.75				1340	2.47368	0.42105
1350	3.2	0.7				1350	2.63158	0.47368
1360	3.15	0.8				1360	2.73684	0.31579
1370	2.9	0.85				1370	2.57895	0.31579
1380	3	0.85				1380	2.52632	0.31579
1390	3.05	0.7				1390	2.21053	0.42105
1400	2.95	0.8				1400	2.21053	0.42105
1410	2.65	0.9				1410	2.21053	0.42105
1420	2.85	0.65				1420	2.21053	0.36842
1430	2.75	0.7				1430	2.26316	0.31579
1440	2.8	0.8				1440	2.15789	0.26316
1450	3.2	0.55				1450	2.15789	0.26316
1460	3.05	0.65				1460	2	0.31579
1470	2.9	0.75				1470	2.15789	0.31579
1480	3.1	0.65				1480	1.94737	0.42105
1490	3	0.8				1490	2	0.26316
1500	3.3	0.7				1500	1.89474	0.26316
1510	3.3	0.7				1510	1.94737	0.26316
1520	3.1	0.65				1520	2.10526	0.26316
1530	3.25	0.6				1530	2.15789	0.21053
1540	3.15	0.75				1540	2.26316	0.15789
1550	3.3	0.75				1550	2.31579	0.21053
1560	3.15	0.7				1560	2.42105	0.15789
1570	3.15	0.75				1570	2.26316	0.26316
1580	2.9	0.8				1580	2.42105	0.21053
1590	2.75	0.9				1590	2.42105	0.21053
1600	2.85	0.65				1600	2.36842	0.21053
1610	2.75	0.7				1610	2.47368	0.26316
1620	2.8	0.75				1620	2.47368	0.21053
1630	2.85	0.8				1630	2.52632	0.21053
1640	2.85	0.8				1640	2.47368	0.15789
1650	2.85	0.85				1650	2.57895	0.10526
1660	2.95	0.65				1660	2.57895	0.15789
1670	2.75	0.75				1670	2.73684	0.15789
1680	2.75	0.8				1680	2.89474	0.10526
1690	2.85	0.65				1690	2.68421	0.21053
1700	2.95	0.7				1700	2.68421	0.10526
1710	2.8	1				1710	2.84211	0.10526
1720	2.95	0.8				1720	2.63158	0.15789
1730	2.9	0.9				1730	2.63158	0.10526
1740	3.05	0.65				1740	2.63158	0.10526
1750	2.9	0.75				1750	2.52632	0.10526
1760	3	0.65				1760	2.42105	0.15789
1770	2.85	0.8				1770	2.42105	0.10526
1780	3	0.65				1780	2.36842	0.10526
1790	3	0.75				1790	2.15789	0.26316
1800	2.75	0.9				1800	2.31579	0.21053
1810	2.95	0.65				1810	2.42105	0.15789
1820	2.7	0.7				1820	2.57895	0.05263
1830	2.65	0.8				1830	2.63158	0.05263
1840	2.65	0.75				1840	2.52632	0.15789
1850	2.7	0.65				1850	2.63158	0.10526
1860	2.7	0.65				1860	2.63158	0.15789
1870	2.7	0.8				1870	2.57895	0.26316
1880	2.65	0.85				1880	2.47368	0.31579
1890	2.8	0.65				1890	2.36842	0.26316
1900	2.85	0.55				1900	2.15789	0.42105
1910	2.7	0.55				1910	2.10526	0.36842
1920	2.55	0.6				1920	2.42105	0.21053
1930	2.5	0.7				1930	2.21053	0.36842
1940	2.45	0.65				1940	2.26316	0.36842
1950	2.4	0.65				1950	2.42105	0.10526
1960	2.1	0.7				1960	2.10526	0.21053
1970	2	0.4				1970	2.05263	0.10526
1980	1.35	0.4				1980	1.42105	0.15789
