# Supplementary material for: The delayed kinetics of Myddosome formation explains why amyloid-beta aggregates trigger Toll-like receptor 4 less efficiently than lipopolysaccharide
Source: eLife. 2024 Jun 12;13:RP92350. doi: 10.7554/eLife.92350 (PMC11168745; doi:10.7554/eLife.92350)
Supplement: Figure 9—source data 1. [file elife-92350-fig9-data1.xlsx]

## Sheet: size with time
lps full width half maxima /um											abeta full width half maxima /um
30 min	3 hr	6 hr	12 hr	24 hr							30 min	3 hr	6 hr	12 hr	24 hr
0.16485	0.12717	0.18605	0.2826	0.10127							0.22709	0.29397	0.2355	0.2355	0.2096
0.23079	0.14601	0.30615	0.2355	0.17427							0.45854	0.19664	0.41684	0.35325	0.22844
0.22373	0.14366	0.16956	0.1884	0.19311							0.26357	0.17583	0.32028	0.2826	0.32028
0.21902	0.20253	0.2355	0.15779	0.21195							0.27448	0.23724	0.27318	0.2096	0.44981
0.20253	0.19782	0.28967	0.2826	0.27318							0.43499	0.30629	0.21195	0.28731	0.23079
0.18134	0.17427	0.2826	0.3768	0.27318							0.24391	0.23745	0.32264	0.22844	0.15779
0.22137	0.20018	0.3297	0.2096	0.3038							0.34489	0.24438	0.18134	0.25199	0.29909
0.14837	0.14837	0.16956	0.18605	0.3297							0.28985	0.21458	0.34619	0.2355	0.2355
0.1884	0.15779	0.17898	0.17427	0.17663							0.37037	0.26435	0.27789	0.38858	0.3038
0.1413	0.10362	0.2355	0.16485	0.50868							0.20087	0.37308	0.31557	0.46158	0.31086
0.21195	0.19782	0.18605	0.13895	0.39093							0.27815	0.18247	0.2355	0.33441	0.32735
0.15072	0.13424	0.18134	0.2355	0.26141							0.2213	0.2664	0.21431	0.2826	0.471
0.19076	0.17192	0.3768	0.13895	0.27789							0.2469	0.26689	0.17663	0.19547	0.19311
0.20724	0.14837	0.22137	0.11775	0.22608							0.17985	0.22111	0.14837	0.7065	0.26612
0.2826	0.16485	0.1884	0.0942	0.1884							0.30233	0.22092	0.2826	0.38387	0.39093
0.15779	0.16485	0.2826	0.15543	0.35796							0.24687	0.21526	0.471	0.18369	0.3297
0.16485	0.30615	0.2826	0.1625	0.36738							0.36719	0.28521	0.3297	0.2355	0.34619
0.11775	0.05888	0.3297	0.2355	0.23079							0.40221	0.19437	0.20018	0.18134	0.7065
0.12717	0.09185	0.17427	0.2355	0.24963							0.27099	0.20444	0.29438	0.38151	0.43332
0.16485	0.10833	0.15543	0.21195	0.30615							0.35097	0.23915	0.12011	0.19311	0.22137
0.15779	0.13424	0.21902	0.20724	0.33206							0.32153	0.59066	0.3038	0.12717	0.26847
0.12717	0.15308	0.16956	0.20018	0.20489							0.28512	0.17428	0.11775	0.16956	0.35325
0.18134	0.20253	0.34619	0.25905	0.398							0.37152	0.23136	0.24021	0.56049	0.41684
0.19547	0.17663	0.2826	0.2826	0.32735							0.29631	0.26002	0.22608	0.45452	0.74418
0.17898	0.10598	0.13188	0.17427	0.13659							0.20674	0.36067	0.14366	0.21431	0.16956
0.1413	0.20018	0.20724	0.14601	0.50397							0.33441	0.27057	0.29673	0.1884	0.16485
0.20724	0.12482	0.21666	0.23079	0.15072							0.17568	0.20963	0.3038	0.3038	0.19311
0.10833	0.08007	0.0942	0.17663	0.2096							0.24746	0.25071	0.31322	0.19782	0.20018
0.11069	0.0942	0.18134	0.12246	0.20253							0.20658	0.3029	0.17663	0.2355	0.23079
0.19782	0.1413	0.24492	0.19076	0.471							0.1903	0.20293	0.51104	0.24728	0.68295
0.13188	0.11775	0.14601	0.15072	0.45923							0.18153	0.25269	0.2826	0.39093	0.21666
0.25199	0.1625	0.24257	0.34383	0.27789							0.4011	0.20759	0.15072	0.4239	0.21195
0.19311	0.20489	0.22608	0.35561	0.14601							0.18923	0.21676	0.23315	0.3768	0.33441
0.22137	0.3768	0.13188	0.32264	0.17427							0.15933	0.2355	0.28731	0.54872	0.29438
0.22608	0.2355	0.29673	0.62643	0.25199							0.315	0.471	0.27318	0.32264	0.21195
0.15779	0.14601	0.32735	0.24963	0.17663							0.3809	0.48042	0.33441	0.9891	0.471
0.15072	0.13188	0.26376	0.21195	0.17192							0.51473	0.21902	0.38387	0.40977	0.29673
0.12246	0.0942	0.10127	0.62408	0.16485							0.38492	0.24492	0.51339	0.29909	0.36503
0.17427	0.12246	0.26847		0.39329							0.20252	0.36032	0.22373	0.2355	0.19782
0.16014	0.08949	0.46558		0.35796							0.27506	0.13895	0.67353		0.67589
0.20018	0.08243	0.20724		0.942							0.32789	0.1154	0.47571		1.15395
0.22844	0.21195	0.31322		0.65234							0.28618	0.18369	0.43803
0.13659	0.08243	0.2826		0.24492							0.41074	0.13895	0.61937
0.15779	0.0942	0.25434		0.19547							0.39981	0.14837	0.73947
0.16485	0.2355	0.30851									0.29367	0.13659	0.52517
0.23079	0.0942	0.21666									0.24297	0.22137	0.16956
0.18134	0.40977	0.40035									0.30471	0.10127	0.30615
0.15543	0.22844	0.21902									0.19181	0.25905
0.08949	0.18605	0.24728									0.21422	0.1625
0.18605	0.25905	0.19311									0.25662	0.12717
0.17663	0.15072	0.32264									0.38151	0.18369
0.20018	0.07772	0.36032									0.36974	0.10833
0.1884	0.10362										0.2355	0.12482
0.22608	0.20489										0.08007	0.22373
0.22373	0.32499										0.2826	0.11069
0.19547	0.37209										0.08243	0.17898
0.16485	0.28731										0.2096	0.27554
0.16014	0.3297										0.2826	0.2826
0.18369	0.2355										0.20724	0.21195
0.12011	0.40742										0.1413	0.471
0.15072	0.11775										0.11069	0.32499
0.22844	0.1884										0.16721	0.35325
0.15072	0.31793										0.43803	0.33677
0.19076	0.1413										0.15072	0.48984
0.14366	0.33677										0.16956	0.5652
0.2355	0.27318										0.09891	0.11069
0.17823	0.20489										0.13659	0.84074
0.08007	0.14601										0.16485	0.24728
0.17663	0.3768										0.19782	0.36738
0.22844	0.34854										0.15308
0.2355	0.51104										0.13424
0.18958											0.471
0.2826											0.24257
0.13188											0.40035
0.0942											0.34383
0.07301											0.16014
0.16956											0.471
0.17427											0.38622
0.07065											0.44745
0.22137											0.32028
0.07065											0.22844
0.06594											0.28731
0.10362											0.13188
0.13188											0.12011
0.12482											0.12717
0.1625											0.13424
0.16485
0.11775
0.2355
0.0942
0.13895
0.10833
0.21902
0.07065
0.08949
0.10127
0.16721
0.29438
0.12482
0.17192
0.2826
0.22608
0.20253
0.13188
0.22844
0.29438
0.18369
0.19311
0.25905
0.14837
0.1884
0.2826
0.22373
0.1413
0.27554
0.1413
0.1884
0.2826
0.10127
0.06594
0.10127
0.25905
0.3768
0.2826
0.34383
0.18369
0.1779	0.26756
0.05951	0.08334
