# Supplementary material for: The delayed kinetics of Myddosome formation explains why amyloid-beta aggregates trigger Toll-like receptor 4 less efficiently than lipopolysaccharide
Source: eLife. 2024 Jun 12;13:RP92350. doi: 10.7554/eLife.92350 (PMC11168745; doi:10.7554/eLife.92350)
Supplement: Figure 10—source data 1. [file elife-92350-fig10-data1.xlsx]

## Sheet: shape factor analysis
LPS 30 mins stimulation					LPS	Abeta
shape factor	Area (um^2)			Time/min	fraction (sf =1)	fraction (sf = 1)
0.83874	0.0637			30	0.69061	0.46396
1	0.00182			180	0.06471	0.08696
0.96418	0.01047			360	0.08735	0.05036
1	0.00137			720	0.09921	0.08444
0.13823	0.27482			1440	0.09643	0.04889
1	0.00137
0.71448	0.00683
1	0.00182
0.38809	0.00819
1	0.00091
0.92273	0.00819
0.54447	0.09874
1	0.00182
1	0.00182
0.27373	0.20293
1	0.00182
0.80011	0.00319
1	0.00091
1	0.00091
1	0.00091
1	0.00091
1	0.00137
0.71868	0.00273
0.3571	0.11967
1	0.00455
0.36826	0.02685
0.83842	0.00455
0.46582	0.10465
0.23553	0.01593
1	0.00091
1	0.00137
1	0.00273
0.24081	0.15607
1	0.00137
1	0.00091
1	0.00137
1	0.00091
0.91631	0.00546
0.73527	0.14651
1	0.00091
1	0.00182
1	0.00228
1	0.00137
1	0.0041
1	0.00137
0.55282	0.00728
0.74114	0.00501
1	0.00455
0.42673	0.05506
1	0.0041
1	0.00273
1	0.00364
1	0.00137
0.76978	0.02776
0.87589	0.00592
0.33628	0.26845
1	0.00228
1	0.00091
1	0.00091
1	0.00137
1	0.00091
0.79735	0.03822
0.51204	0.05415
0.31462	0.02503
1	0.00182
0.56147	0.06825
1	0.00546
0.50775	0.01456
0.2723	0.04823
0.28029	0.01183
1	0.00182
1	0.00501
0.94768	0.05369
0.9248	0.00455
1	0.00137
0.63139	0.10192
1	0.00182
1	0.00182
0.55325	0.00455
0.78523	0.02685
1	0.00091
1	0.00364
0.93502	0.03868
0.34437	0.01047
0.46692	0.06734
0.68694	0.11284
1	0.00319
0.65409	0.04186
1	0.00182
1	0.00182
1	0.00364
1	0.00182
1	0.00137
1	0.00091
0.83846	0.01274
1	0.00091
1	0.00091
0.40111	0.0132
0.6612	0.04232
1	0.00137
1	0.00637
1	0.01183
0.94866	0.04004
1	0.00228
0.47208	0.24661
1	0.00137
0.08616	0.88452
1	0.00091
1	0.00137
1	0.00091
1	0.00091
1	0.00091
1	0.00091
1	0.00228
1	0.00137
1	0.00137
1	0.00137
1	0.00273
0.67377	0.00455
0.67073	0.00364
1	0.00091
1	0.00273
1	0.00273
1	0.00091
0.35201	0.01456
1	0.00228
1	0.00228
0.75457	0.0041
1	0.00091
1	0.00137
1	0.00182
1	0.00228
1	0.00137
1	0.00091
1	0.00182
1	0.00091
1	0.00319
1	0.00091
0.28724	0.24798
1	0.00091
0.54332	0.02048
1	0.00182
1	0.00091
0.74565	0.0546
1	0.00228
1	0.00228
0.71205	0.04505
1	0.00228
1	0.00091
0.68116	0.01274
0.52217	0.02821
0.63393	0.12467
0.41801	0.00865
0.66677	0.00774
1	0.00091
0.31321	0.09373
1	0.00091
1	0.00091
0.51055	0.15061
1	0.00137
1	0.00273
1	0.00091
1	0.00091
0.33915	0.03777
1	0.00182
0.9248	0.00228
1	0.00091
0.63269	0.11284
0.48134	0.13195
1	0.00091
1	0.00182
0.31071	0.07599
1	0.00228
1	0.00182
1	0.00091
0.35933	0.09146
1	0.00137
1	0.00137
0.19552	0.30076
0.52036	0.00728
1	0.00091
1	0.00091
0.36691	0.05142
0.12505	0.0637
1	0.00273
1	0.00137
0.92226	0.00501
0.85737	0.00364
1	0.00091
1	0.00273
1	0.00091
0.29037	0.01411
0.9248	0.00455
1	0.00273
1	0.0041
1	0.00546
0.47164	0.00819
1	0.00091
1	0.00319
1	0.00228
1	0.00137
0.18788	0.0132
1	0.00319
1	0.00091
0.36171	0.21294
1	0.00137
1	0.00091
1	0.00137
0.39154	0.20521
1	0.00137
1	0.00091
1	0.00137
0.48505	0.11694
1	0.00091
1	0.00364
1	0.00091
1	0.00273
0.68202	0.01411
1	0.00137
1	0.00228
1	0.00182
1	0.00091
1	0.00137
1	0.00091
1	0.00091
0.40966	0.12012
1	0.00091
1	0.00091
1	0.00091
1	0.00364
1	0.00182
0.38047	0.07189
1	0.00091
1	0.00137
1	0.00091
1	0.00182
1	0.00182
0.52721	0.16972
1	0.00137
0.54882	0.22568
1	0.00091
1	0.00091
1	0.00137
1	0.00091
1	0.00364
0.83842	0.00455
1	0.00228
0.21919	0.10283
0.61525	0.10283
0.83232	0.0041
1	0.00137
1	0.00091
1	0.00455
1	0.00182
1	0.00182
1	0.00137
1	0.00137
1	0.00182
1	0.00091
1	0.00091
0.69114	0.1042
1	0.00091
1	0.00091
0.40101	0.04505
1	0.00228
1	0.00182
1	0.00091
1	0.00091
1	0.00091
1	0.00182
1	0.00091
1	0.00637
1	0.00091
1	0.00091
0.46543	0.11648
1	0.00228
0.13522	0.6461
1	0.00091
1	0.00091
0.57002	0.01365
0.94327	0.00319
1	0.00091
0.42391	0.0728
0.54567	0.08918
0.32103	0.03322
1	0.00091
1	0.00182
1	0.00182
1	0.00091
1	0.00273
0.29503	0.07872
1	0.00273
1	0.00091
1	0.00273
1	0.00137
1	0.00091
0.21702	0.11694
1	0.00182
0.34968	0.01866
1	0.00228
1	0.00182
1	0.00182
0.27545	0.12922
1	0.00273
1	0.00319
0.83846	0.00319
0.60639	0.0041
0.95824	0.00364
1	0.00091
1	0.00228
1	0.00137
1	0.00182
1	0.00182
0.76012	0.01001
1	0.00137
1	0.00137
0.31605	0.16244
1	0.00137
1	0.00137
1	0.00091
1	0.00137
0.22844	0.14378
0.80852	0.00546
1	0.00137
1	0.00228
1	0.00228
1	0.00182
1	0.00228
0.15508	0.14151
1	0.00137
1	0.00182
1	0.00182
1	0.00182
0.47267	0.01047
1	0.00137
1	0.00137
1	0.00228
1	0.00182
1	0.00091
1	0.00273
0.99252	0.00319
1	0.00091
1	0.00137
1	0.00137
1	0.00137
1	0.00091
1	0.00182
1	0.00137
1	0.00091
1	0.00091
0.35632	0.05005
1	0.00182
1	0.00273
1	0.00273
1	0.00364
0.34907	0.01001
1	0.00137
1	0.00091
1	0.00228
1	0.00546
0.92226	0.00501
1	0.00182
0.20156	0.08327
1	0.00228
0.52846	0.0637
1	0.00228
0.46687	0.24388
1	0.00091
1	0.00137
1	0.0041
1	0.00091
1	0.00091
1	0.00228
1	0.00091
1	0.00091
1	0.00137
1	0.00091
1	0.00182
1	0.00319
1	0.00228
1	0.00091
1	0.00182
1	0.00091
1	0.00091
1	0.00182
1	0.00091
1	0.00137
1	0.00137
1	0.00319
1	0.00137
1	0.00273
0.96737	0.00546
1	0.00137
1	0.00182
1	0.00137
1	0.00091
1	0.00091
1	0.00137
1	0.00091
1	0.00091
1	0.00228
1	0.00182
1	0.00182
1	0.00455
0.95824	0.00364
1	0.00182
1	0.00091
1	0.00137
1	0.00091
0.51486	0.00637
1	0.00137
0.21252	0.12422
1	0.00364
1	0.00182
1	0.00182
1	0.00091
0.79872	0.0041
1	0.00091
1	0.0041
1	0.00455
0.16129	0.09965
1	0.00182
1	0.00137
1	0.00091
0.4426	0.00728
1	0.00137
0.07697	0.49504
1	0.00091
1	0.00091
0.27342	0.0223
1	0.00182
0.80615	0.00228
1	0.00501
1	0.00182
1	0.00091
1	0.00319
1	0.00091
1	0.00091
1	0.00137
1	0.00091
1	0.00091
0.3902	0.01957
1	0.00091
1	0.00091
1	0.00137
1	0.00137
0.94327	0.00319
1	0.00091
1	0.00364
1	0.00091
0.62518	0.00774
1	0.00091
1	0.00364
1	0.00182
0.24748	0.21886
1	0.00319
1	0.00273
1	0.00137
1	0.00319
1	0.00091
1	0.00228
1	0.00273
1	0.00091
0.34116	0.0182
1	0.00364
1	0.00091
1	0.00501
1	0.00182
0.47912	0.00728
0.53901	0.00728
1	0.00455
1	0.00182
1	0.00137
1	0.00273
1	0.00364
1	0.00319
1	0.00091
1	0.00182
1	0.00273
1	0.00091
0.55163	0.00683
0.52647	0.00819
1	0.00091
1	0.00091
1	0.00091
1	0.00137
0.59652	0.00546
1	0.00364
1	0.00091
1	0.00091
1	0.00273
0.65045	0.00455
1	0.00319
0.99267	0.00592
0.53224	0.01593
1	0.00137
1	0.00137
1	0.00182
1	0.00091
0.44428	0.01274
1	0.00273
1	0.00091
0.67517	0.00319
1	0.00091
1	0.00182
1	0.00182
1	0.00137
1	0.0041
1	0.00273
1	0.00091
0.49589	0.01047
1	0.00091
1	0.00182
1	0.00137
1	0.00091
1	0.00091
1	0.00182
1	0.00091
1	0.00091
1	0.00137
1	0.00182
0.98175	0.00228
1	0.00091
1	0.00182
1	0.00182
1	0.00546
1	0.00228
0.51263	0.0091
1	0.00364
0.80906	0.00501
1	0.00091
1	0.00364
1	0.00319
0.85737	0.00182
1	0.00228
1	0.00228
1	0.00182
0.18999	0.11512
1	0.00319
1	0.00182
1	0.00182
1	0.00182
1	0.00182
0.71868	0.00273
1	0.00091
0.17276	0.03094
1	0.00091
1	0.00091
1	0.00137
0.64623	0.00592
0.08939	0.51097
1	0.00137
1	0.00091
1	0.00228
1	0.00273
1	0.00319
1	0.00182
1	0.00319
1	0.00501
1	0.00091
1	0.00182
0.19389	0.41178
0.92226	0.00501
1	0.00137
1	0.00182
1	0.00182
1	0.00273
1	0.00455
1	0.00091
0.8193	0.00865
0.83842	0.00455
1	0.00273
1	0.00137
1	0.00364
1	0.00364
1	0.00137
1	0.00091
1	0.00273
1	0.00273
0.67377	0.00455
1	0.00091
1	0.00091
1	0.00137
1	0.00592
1	0.00319
1	0.00091
1	0.00137
1	0.00137
1	0.00137
1	0.00091
1	0.00091
1	0.00319
1	0.00091
0.59833	0.02321
1	0.00137
1	0.00091
1	0.00273
1	0.00091
0.43121	0.00455
1	0.00182
1	0.0041
1	0.00182
1	0.00091
1	0.00137
1	0.00091
1	0.00091
1	0.00137
1	0.00182
1	0.00137
1	0.00091
1	0.00182
1	0.00091
1	0.00182
1	0.00091
1	0.00091
0.07306	0.43225
1	0.00137
1	0.00137
1	0.00091
1	0.00091
0.22084	0.04459
1	0.00091
1	0.00091
0.74338	0.00546
1	0.00228
1	0.00228
0.62885	0.00956
0.22503	0.01684
1	0.00091
1	0.00091
1	0.00091
1	0.00228
1	0.00137
1	0.00182
1	0.00182
1	0.00182
1	0.00273
0.80011	0.00319
1	0.00091
1	0.00455
1	0.00228
1	0.00455
1	0.00091
1	0.00091
1	0.00182
1	0.00091
1	0.00273
1	0.00182
0.15893	0.03777
1	0.00273
1	0.00091
0.60112	0.00592
1	0.00137
0.21725	0.03595
0.9248	0.00455
1	0.00228
1	0.00137
1	0.00182
1	0.00182
1	0.00319
1	0.00273
1	0.00091
0.72553	0.0041
1	0.00228
1	0.00455
1	0.00273
0.40965	0.00865
1	0.00228
1	0.00228
1	0.00182
1	0.00364
1	0.00546
1	0.00228
1	0.00091
1	0.00182
1	0.00091
1	0.00137
0.37994	0.02639
1	0.00273
0.1274	0.2316
0.96737	0.00273
1	0.00091
0.89835	0.00683
1	0.00091
1	0.00091
1	0.00319
0.3954	0.01502
0.7502	0.00319
1	0.00273
1	0.00455
1	0.00182
1	0.00228
1	0.00546
0.8202	0.00728
0.83846	0.00592
1	0.00091
1	0.00455
0.8202	0.00364
1	0.00091
1	0.00182
1	0.00182
1	0.00182
1	0.00273
1	0.00091
1	0.00546
1	0.00228
1	0.00319
1	0.00137
1	0.00319
1	0.00137
1	0.00091
1	0.00182
0.31831	0.22841
0.64492	0.00364
1	0.00637
0.19373	0.0951
1	0.00228
1	0.00091
1	0.00091
1	0.00091
0.41862	0.25435
0.53901	0.00364
1	0.00182
1	0.00091
1	0.00091
1	0.00137
1	0.00182
1	0.00137
1	0.00091
0.26298	0.03822
1	0.00137
0.98175	0.00228
1	0.00137
1	0.00137
1	0.00091
1	0.00182
1	0.00091
1	0.00364
1	0.00091
0.73551	0.00865
1	0.00273
1	0.00137
1	0.00182
1	0.00091
1	0.00091
1	0.00091
1	0.00228
1	0.00091
0.06851	0.74757
0.47066	0.00546
1	0.00319
1	0.00091
1	0.00319
1	0.00091
1	0.00091
1	0.00273
1	0.00137
1	0.00182
1	0.00228
0.66642	0.00956
1	0.00091
0.50988	0.00592
1	0.00091
1	0.00137
1	0.00228
0.50574	0.01729
1	0.00091
1	0.00319
0.74114	0.00501
1	0.00137
1	0.00091
1	0.00137
1	0.00091
1	0.00182
1	0.00091
1	0.00091
1	0.00228
1	0.00319
1	0.00091
1	0.00319
1	0.00091
1	0.00091
0.92226	0.00501
1	0.00137
1	0.00091
1	0.00091
1	0.00091
1	0.00228
1	0.00228
1	0.00273
1	0.00364
1	0.00182
1	0.00091
1	0.00137
1	0.00364
1	0.00228
1	0.00091
1	0.00228
1	0.00091
1	0.00091
1	0.00137
1	0.00091
1	0.00091
0.23082	0.18428
1	0.00137
1	0.00137
1	0.00091
1	0.00091
0.9248	0.00455
0.47433	0.00501
1	0.00228
1	0.00091
1	0.00228
1	0.00228
1	0.00091
1	0.00091
1	0.00091
1	0.00091
0.67073	0.00364
1	0.00091
1	0.00455
1	0.00091
1	0.00228
1	0.00091
0.9248	0.00455
1	0.00137
1	0.00091
1	0.00319
1	0.00091
1	0.00228
1	0.00137
1	0.00137
0.34888	0.06507
1	0.00091
1	0.00137
1	0.00228
1	0.00182
1	0.00137
1	0.00091
1	0.00273
1	0.00182
0.88261	0.00546
1	0.00091
0.48588	0.06097
1	0.00091
0.36371	0.3549
1	0.00091
1	0.0041
1	0.00273
1	0.00091
0.09142	0.70616
1	0.00091
1	0.00137
1	0.00137
1	0.00364
1	0.00137
1	0.00137
1	0.00364
0.50868	0.14924
1	0.02685
1	0.00091
0.77455	0.05096
1	0.00091
0.32392	0.12422
0.6759	0.03094
0.76296	0.06006
1	0.00091
0.52284	0.04414
1	0.00091
0.91631	0.00273
1	0.00364
1	0.00228
0.15454	0.16153
0.68143	0.00501
1	0.00091
1	0.00228
1	0.00228
0.92226	0.00501
1	0.00137
0.21423	0.3185
1	0.00182
1	0.00091
1	0.00455
1	0.00137
1	0.00182
1	0.00091
0.52663	0.13514
1	0.00091
1	0.00364
1	0.00182
1	0.00273
0.71549	0.00501
1	0.00319
0.49293	0.26663
1	0.00455
1	0.00091
0.18544	0.04095
1	0.00091
1	0.00228
0.46623	0.3863
1	0.00091
0.23806	0.33943
1	0.00091
1	0.00182
0.50157	0.18155
0.50227	0.2002
1	0.00319
1	0.00137
0.41181	0.1638
0.7327	0.12376
1	0.00091
0.60112	0.00592
0.42759	0.02867
1	0.00182
0.99252	0.00319
0.85737	0.00182
1	0.00273
1	0.00228
1	0.00091
0.88747	0.00455
0.60112	0.00592
1	0.00091
1	0.00091
0.3281	0.01183
0.76952	0.04232
0.38923	0.00728
0.24904	0.56056
1	0.00137
1	0.00228
1	0.00091
1	0.00091
1	0.00137
1	0.00228
0.43121	0.00455
1	0.00091
1	0.00182
1	0.00228
1	0.00137
0.7502	0.00319
0.40361	0.01138
1	0.00137
1	0.00228
1	0.00182
1	0.00273
1	0.00182
1	0.00273
1	0.00273
0.96737	0.00273
1	0.00137
1	0.00137
1	0.00091
0.8202	0.00364
0.88261	0.00546
1	0.00273
1	0.00182
0.22492	0.54236
1	0.00091
1	0.00091
1	0.00273
1	0.00137
1	0.00091
1	0.00091
1	0.00091
1	0.00182
1	0.00137
1	0.00182
1	0.00137
1	0.00182
1	0.0041
0.5643	0.00319
1	0.00137
1	0.00364
1	0.00091
1	0.00273
1	0.00228
0.21303	0.78215
1	0.00182
1	0.00091
1	0.00182
0.61948	0.00455
1	0.00091
1	0.00182
0.61948	0.00455
1	0.00273
0.40176	0.01638
1	0.00455
1	0.00182
1	0.00091
1	0.00091
1	0.00455
1	0.00182
0.46829	0.03686
1	0.00137
0.31591	0.01866
0.21852	0.02048
0.20363	0.15061
0.42218	0.04141
0.28366	0.0273
0.46298	0.01229
0.42563	0.1365
0.37361	0.04323
0.39857	0.03413
0.35269	0.02048
0.46909	0.02503
0.21305	0.07553
0.45231	0.0132
0.31062	0.05005
0.38392	0.02457
0.95264	0.0091
0.47026	0.01502
0.26401	0.02184
0.16593	0.02412
0.39534	0.01957
0.13498	0.05142
0.27499	0.02412
0.31443	0.01729
0.16276	0.08691
0.54816	0.01638
0.46618	0.02002
0.55224	0.02366
0.49264	0.02503
0.11812	0.06097
0.85737	0.00728
0.72557	0.00956
0.2023	0.02321
0.38929	0.02366
0.47829	0.02048
0.79917	0.02685
0.51522	0.01775
0.11874	0.09328
0.39791	0.13832
0.35962	0.02275
0.9248	0.00455
0.40458	0.08281
1	0.00091
1	0.00091
0.26972	0.03413
0.25204	0.01866
0.35114	0.03322
0.44773	0.15971
0.22554	0.3549
1	0.00091
0.34231	0.07417
0.46139	0.14424
0.14082	0.03231
0.16069	0.0455
0.23802	0.07735
0.12417	0.23478
0.17381	0.0364
1	0.0041
0.29024	0.04095
0.2209	0.03504
0.1725	0.0546
0.36891	0.03959
0.48892	0.02048
0.34468	0.01684
0.36865	0.02002
0.465	0.17017
0.27083	0.01638
0.3702	0.01775
1	0.00228
0.41054	0.07644
0.18748	0.07872
0.28122	0.12922
0.24019	0.08918
0.70853	0.03094
0.27679	0.06871
1	0.00182
1	0.00091
0.33554	0.02457
0.68922	0.08691
0.65898	0.02821
0.19334	0.1588
0.92273	0.0041
0.28187	0.02275
0.18499	0.02639
0.58031	0.02366
0.92273	0.00819
0.88676	0.00501
0.39224	0.13923
1	0.04641
0.41939	0.07326
0.57166	0.02093
0.5952	0.02548
0.70092	0.04869
0.48806	0.08054
